# Supplementary material
Source: MDPI journal article supplement (https://www.mdpi.com/2311-5521/5/2/72)
Supplement: s1 [file s1]

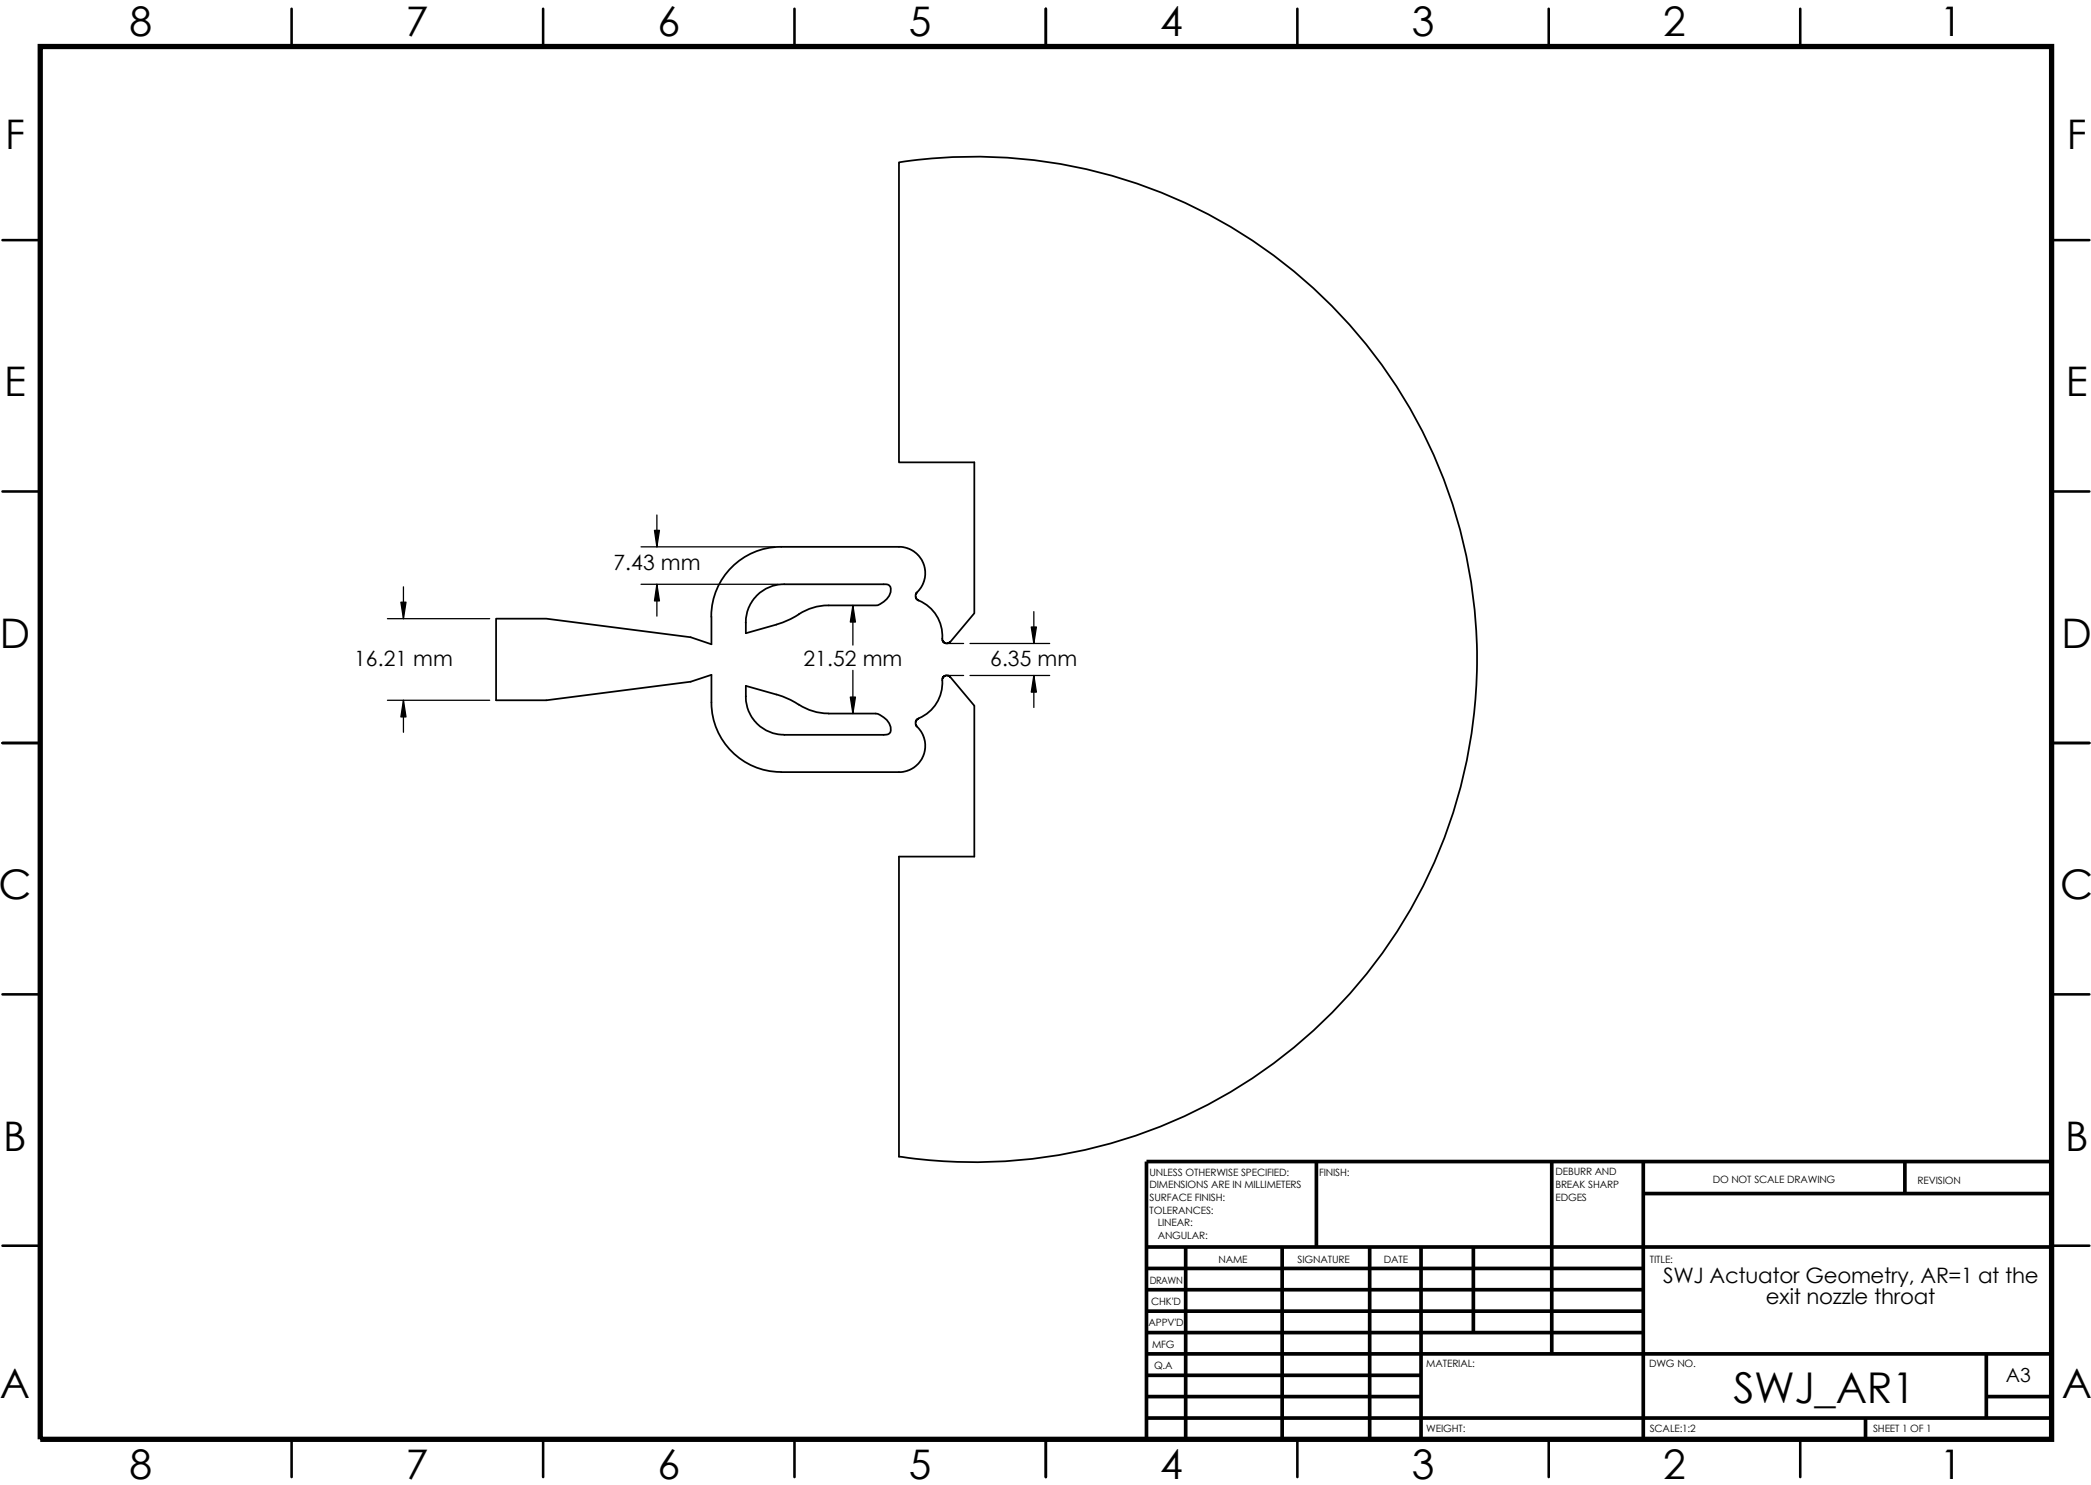

|                                                                                                                       |  |      |  |           |  |                                    |  |                      |  |                                                                    |  |
|-----------------------------------------------------------------------------------------------------------------------|--|------|--|-----------|--|------------------------------------|--|----------------------|--|--------------------------------------------------------------------|--|
| UNLESS OTHERWISE SPECIFIED:<br>DIMENSIONS ARE IN MILLIMETERS<br>SURFACE FINISH:<br>TOLERANCES:<br>LINEAR:<br>ANGULAR: |  |      |  | FINISH:   |  | DEBURR AND<br>BREAK SHARP<br>EDGES |  | DO NOT SCALE DRAWING |  | REVISION                                                           |  |
|                                                                                                                       |  |      |  |           |  |                                    |  |                      |  |                                                                    |  |
|                                                                                                                       |  | NAME |  | SIGNATURE |  | DATE                               |  |                      |  | TITLE:<br>SWJ Actuator Geometry, AR=1 at the<br>exit nozzle throat |  |
| DRAWN                                                                                                                 |  |      |  |           |  |                                    |  |                      |  |                                                                    |  |
| CHK'D                                                                                                                 |  |      |  |           |  |                                    |  |                      |  |                                                                    |  |
| APP'VD                                                                                                                |  |      |  |           |  |                                    |  |                      |  |                                                                    |  |
| MFG                                                                                                                   |  |      |  |           |  |                                    |  |                      |  |                                                                    |  |
| Q.A.                                                                                                                  |  |      |  |           |  |                                    |  |                      |  |                                                                    |  |
|                                                                                                                       |  |      |  |           |  |                                    |  |                      |  | DWG NO.<br><br>SWJ_AR1                                             |  |
|                                                                                                                       |  |      |  |           |  |                                    |  |                      |  |                                                                    |  |
|                                                                                                                       |  |      |  |           |  |                                    |  |                      |  | A3                                                                 |  |
|                                                                                                                       |  |      |  |           |  |                                    |  |                      |  |                                                                    |  |
|                                                                                                                       |  |      |  |           |  |                                    |  |                      |  |                                                                    |  |
|                                                                                                                       |  |      |  |           |  |                                    |  |                      |  |                                                                    |  |
|                                                                                                                       |  |      |  |           |  |                                    |  |                      |  |                                                                    |  |
|                                                                                                                       |  |      |  |           |  |                                    |  |                      |  |                                                                    |  |
|                                                                                                                       |  |      |  |           |  |                                    |  |                      |  |                                                                    |  |
|                                                                                                                       |  |      |  |           |  |                                    |  |                      |  |                                                                    |  |
|                                                                                                                       |  |      |  |           |  |                                    |  |                      |  |                                                                    |  |
|                                                                                                                       |  |      |  |           |  |                                    |  |                      |  |                                                                    |  |
|                                                                                                                       |  |      |  |           |  |                                    |  |                      |  |                                                                    |  |
|                                                                                                                       |  |      |  |           |  |                                    |  |                      |  |                                                                    |  |
|                                                                                                                       |  |      |  |           |  |                                    |  |                      |  |                                                                    |  |
|                                                                                                                       |  |      |  |           |  |                                    |  |                      |  |                                                                    |  |
|                                                                                                                       |  |      |  |           |  |                                    |  |                      |  |                                                                    |  |
|                                                                                                                       |  |      |  |           |  |                                    |  |                      |  |                                                                    |  |
|                                                                                                                       |  |      |  |           |  |                                    |  |                      |  |                                                                    |  |
|                                                                                                                       |  |      |  |           |  |                                    |  |                      |  |                                                                    |  |
|                                                                                                                       |  |      |  |           |  |                                    |  |                      |  |                                                                    |  |
|                                                                                                                       |  |      |  |           |  |                                    |  |                      |  |                                                                    |  |
|                                                                                                                       |  |      |  |           |  |                                    |  |                      |  |                                                                    |  |
|                                                                                                                       |  |      |  |           |  |                                    |  |                      |  |                                                                    |  |
|                                                                                                                       |  |      |  |           |  |                                    |  |                      |  |                                                                    |  |
|                                                                                                                       |  |      |  |           |  |                                    |  |                      |  |                                                                    |  |
|                                                                                                                       |  |      |  |           |  |                                    |  |                      |  |                                                                    |  |
|                                                                                                                       |  |      |  |           |  |                                    |  |                      |  |                                                                    |  |
|                                                                                                                       |  |      |  |           |  |                                    |  |                      |  |                                                                    |  |
|                                                                                                                       |  |      |  |           |  |                                    |  |                      |  |                                                                    |  |
|                                                                                                                       |  |      |  |           |  |                                    |  |                      |  |                                                                    |  |
|                                                                                                                       |  |      |  |           |  |                                    |  |                      |  |                                                                    |  |
|                                                                                                                       |  |      |  |           |  |                                    |  |                      |  |                                                                    |  |
|                                                                                                                       |  |      |  |           |  |                                    |  |                      |  |                                                                    |  |
|                                                                                                                       |  |      |  |           |  |                                    |  |                      |  |                                                                    |  |
|                                                                                                                       |  |      |  |           |  |                                    |  |                      |  |                                                                    |  |
|                                                                                                                       |  |      |  |           |  |                                    |  |                      |  |                                                                    |  |
|                                                                                                                       |  |      |  |           |  |                                    |  |                      |  |                                                                    |  |
|                                                                                                                       |  |      |  |           |  |                                    |  |                      |  |                                                                    |  |
|                                                                                                                       |  |      |  |           |  |                                    |  |                      |  |                                                                    |  |
|                                                                                                                       |  |      |  |           |  |                                    |  |                      |  |                                                                    |  |
|                                                                                                                       |  |      |  |           |  |                                    |  |                      |  |                                                                    |  |
|                                                                                                                       |  |      |  |           |  |                                    |  |                      |  |                                                                    |  |
|                                                                                                                       |  |      |  |           |  |                                    |  |                      |  |                                                                    |  |
|                                                                                                                       |  |      |  |           |  |                                    |  |                      |  |                                                                    |  |
|                                                                                                                       |  |      |  |           |  |                                    |  |                      |  |                                                                    |  |
|                                                                                                                       |  |      |  |           |  |                                    |  |                      |  |                                                                    |  |
|                                                                                                                       |  |      |  |           |  |                                    |  |                      |  |                                                                    |  |
|                                                                                                                       |  |      |  |           |  |                                    |  |                      |  |                                                                    |  |
|                                                                                                                       |  |      |  |           |  |                                    |  |                      |  |                                                                    |  |
|                                                                                                                       |  |      |  |           |  |                                    |  |                      |  |                                                                    |  |
|                                                                                                                       |  |      |  |           |  |                                    |  |                      |  |                                                                    |  |
|                                                                                                                       |  |      |  |           |  |                                    |  |                      |  |                                                                    |  |
|                                                                                                                       |  |      |  |           |  |                                    |  |                      |  |                                                                    |  |
|                                                                                                                       |  |      |  |           |  |                                    |  |                      |  |                                                                    |  |
|                                                                                                                       |  |      |  |           |  |                                    |  |                      |  |                                                                    |  |
|                                                                                                                       |  |      |  |           |  |                                    |  |                      |  |                                                                    |  |
|                                                                                                                       |  |      |  |           |  |                                    |  |                      |  |                                                                    |  |
|                                                                                                                       |  |      |  |           |  |                                    |  |                      |  |                                                                    |  |
|                                                                                                                       |  |      |  |           |  |                                    |  |                      |  |                                                                    |  |
|                                                                                                                       |  |      |  |           |  |                                    |  |                      |  |                                                                    |  |
|                                                                                                                       |  |      |  |           |  |                                    |  |                      |  |                                                                    |  |
|                                                                                                                       |  |      |  |           |  |                                    |  |                      |  |                                                                    |  |
|                                                                                                                       |  |      |  |           |  |                                    |  |                      |  |                                                                    |  |
|                                                                                                                       |  |      |  |           |  |                                    |  |                      |  |                                                                    |  |
|                                                                                                                       |  |      |  |           |  |                                    |  |                      |  |                                                                    |  |
|                                                                                                                       |  |      |  |           |  |                                    |  |                      |  |                                                                    |  |
|                                                                                                                       |  |      |  |           |  |                                    |  |                      |  |                                                                    |  |
|                                                                                                                       |  |      |  |           |  |                                    |  |                      |  |                                                                    |  |
|                                                                                                                       |  |      |  |           |  |                                    |  |                      |  |                                                                    |  |
|                                                                                                                       |  |      |  |           |  |                                    |  |                      |  |                                                                    |  |
|                                                                                                                       |  |      |  |           |  |                                    |  |                      |  |                                                                    |  |
|                                                                                                                       |  |      |  |           |  |                                    |  |                      |  |                                                                    |  |
|                                                                                                                       |  |      |  |           |  |                                    |  |                      |  |                                                                    |  |
|                                                                                                                       |  |      |  |           |  |                                    |  |                      |  |                                                                    |  |
|                                                                                                                       |  |      |  |           |  |                                    |  |                      |  |                                                                    |  |
|                                                                                                                       |  |      |  |           |  |                                    |  |                      |  |                                                                    |  |
|                                                                                                                       |  |      |  |           |  |                                    |  |                      |  |                                                                    |  |
|                                                                                                                       |  |      |  |           |  |                                    |  |                      |  |                                                                    |  |
|                                                                                                                       |  |      |  |           |  |                                    |  |                      |  |                                                                    |  |
|                                                                                                                       |  |      |  |           |  |                                    |  |                      |  |                                                                    |  |
|                                                                                                                       |  |      |  |           |  |                                    |  |                      |  |                                                                    |  |
|                                                                                                                       |  |      |  |           |  |                                    |  |                      |  |                                                                    |  |
|                                                                                                                       |  |      |  |           |  |                                    |  |                      |  |                                                                    |  |
|                                                                                                                       |  |      |  |           |  |                                    |  |                      |  |                                                                    |  |
|                                                                                                                       |  |      |  |           |  |                                    |  |                      |  |                                                                    |  |
|                                                                                                                       |  |      |  |           |  |                                    |  |                      |  |                                                                    |  |
|                                                                                                                       |  |      |  |           |  |                                    |  |                      |  |                                                                    |  |
|                                                                                                                       |  |      |  |           |  |                                    |  |                      |  |                                                                    |  |
|                                                                                                                       |  |      |  |           |  |                                    |  |                      |  |                                                                    |  |
|                                                                                                                       |  |      |  |           |  |                                    |  |                      |  |                                                                    |  |
|                                                                                                                       |  |      |  |           |  |                                    |  |                      |  |                                                                    |  |
|                                                                                                                       |  |      |  |           |  |                                    |  |                      |  |                                                                    |  |
|                                                                                                                       |  |      |  |           |  |                                    |  |                      |  |                                                                    |  |
|                                                                                                                       |  |      |  |           |  |                                    |  |                      |  |                                                                    |  |
|                                                                                                                       |  |      |  |           |  |                                    |  |                      |  |                                                                    |  |
|                                                                                                                       |  |      |  |           |  |                                    |  |                      |  |                                                                    |  |
|                                                                                                                       |  |      |  |           |  |                                    |  |                      |  |                                                                    |  |
|                                                                                                                       |  |      |  |           |  |                                    |  |                      |  |                                                                    |  |
|                                                                                                                       |  |      |  |           |  |                                    |  |                      |  |                                                                    |  |

SWJ\_AR1

A3
